# Supplementary material for: DTWscore: differential expression and cell clustering analysis for time-series single-cell RNA-seq data
Source: PubMed Central journal article supplement (PMC5442705; doi:10.1186/s12859-017-1647-3), 2017-05-23

### Classification

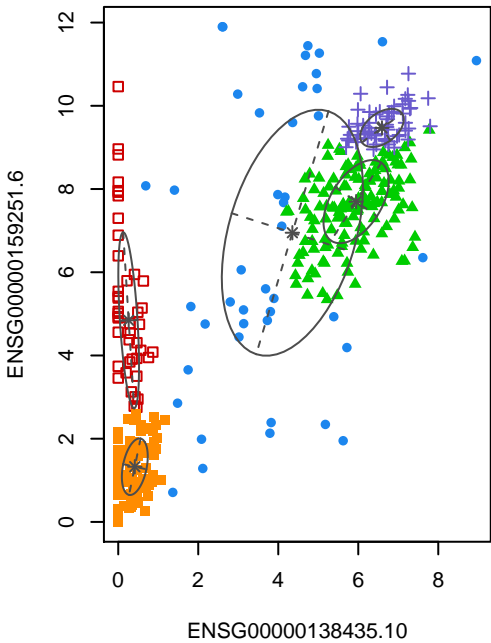

### Classification

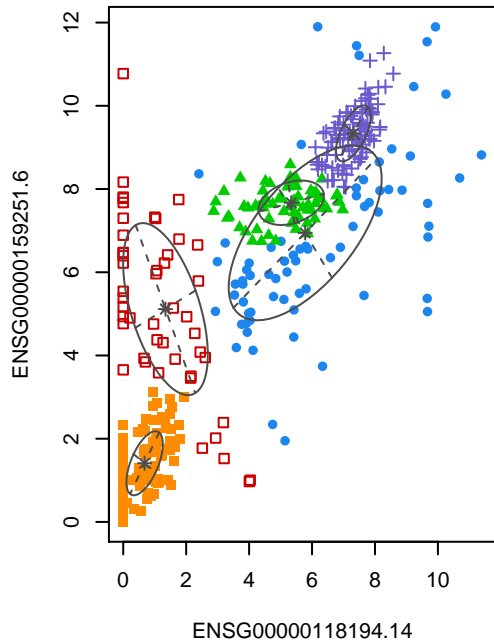

### Classification

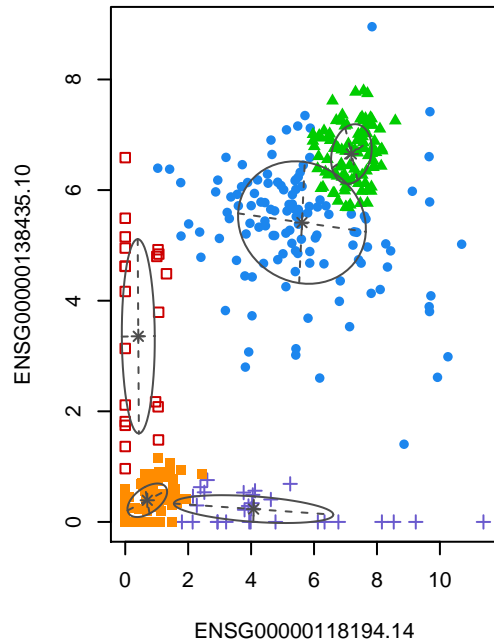

Supplement: 12859_2017_1647_MOESM5_ESM.pdf [file 12859_2017_1647_MOESM5_ESM.pdf]
